# Supplementary material for: Improving feedback on junior doctors’ prescribing errors: mixed-methods evaluation of a quality improvement project
Source: PubMed Central journal article supplement (PMC5339559; doi:10.1136/bmjqs-2015-004717), 2016-04-04
Supplement: bmjqs-2015-004717supp_appendix2.pdf [file bmjqs-2015-004717supp_appendix2.pdf]

## Appendix S2: examples of prescribing tips

### Avoid errors when prescribing IV Pabrinex®: Good Prescribing Tip of the fortnight (this prescription has been re-written to maintain the anonymity of the prescriber)

This is a prescription for an adult patient, what is the dose for this prescription?

| Regular Prescriptions         |                                     | Time                                                                                     | Date    |
|-------------------------------|-------------------------------------|------------------------------------------------------------------------------------------|---------|
| Medicine approved name        | PABRINEX                            | Frequency                                                                                | TDS     |
| Dose                          | 11                                  | Route                                                                                    | IV      |
| Signature                     | [Redacted]                          | Day Date                                                                                 | 2/11/14 |
| Pharmacy                      | [Redacted]                          | Additional instructions including instructions and proposed duration for anti-infectives |         |
| Patient Medicine on admission | <input checked="" type="checkbox"/> | Additional instructions                                                                  |         |

- 1 pair ('ampoule I' + 'ampoule II') TDS
- 2 pairs i.e. 2 x ('ampoule I' + 'ampoule II') TDS
- Only 'ampoule II' TDS
- Not sure

Answer: it's not clear!

The error:

The intended prescription is for 2 pairs of Pabrinex® ('ampoule I' + 'ampoule II') three times a day. However, the prescription can be easily misinterpreted.

The clearest way to prescribe the intended dose is:

Medicine (approved name): **Pabrinex I + II** Dose: **2 pairs** Frequency: **TDS**

**Ambiguous prescribing of Pabrinex® may lead to the inappropriate treatment of Wernicke-Korsakoff Syndrome which can have fatal consequences**

Prescribing tips:

- One single dose of Pabrinex® consists of both ampoule I AND ampoule II

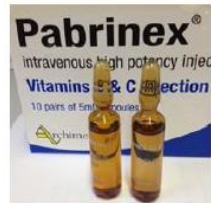

'ampoule I' + 'ampoule II' = 1 pair

- Both ampoules must be administered:
  - Ampoule No. I contains thiamine, riboflavin and pyridoxine
  - Ampoule No. II contains ascorbic acid, nicotinamide and anhydrous glucose
- Pabrinex® should be prescribed as either '1 pair' or '2 pairs' so the instruction for administration is clear:

| Regular Prescriptions         |                                     | Time                                                                                     | Date    |
|-------------------------------|-------------------------------------|------------------------------------------------------------------------------------------|---------|
| Medicine approved name        | PABRINEX I+II                       | Frequency                                                                                | TDS     |
| Dose                          | 2 pairs                             | Route                                                                                    | IV      |
| Signature                     | Dr. Good Example                    | Day Date                                                                                 | 2/11/14 |
| Pharmacy                      | Bleep 9155                          | Additional instructions including instructions and proposed duration for anti-infectives |         |
| Patient Medicine on admission | <input checked="" type="checkbox"/> | Additional instructions                                                                  |         |

Remember to use your name-stamp or print your name when prescribing

Anonymised for review purposes

### Avoid errors when prescribing drugs with unusual frequencies: Good Prescribing Tip of the fortnight (this prescription has been re-written to maintain the anonymity of the prescriber)

This is a prescription for an adult patient, can you spot the error?

| Regular Prescriptions         |                                     | Time                                                                                     | Date        |
|-------------------------------|-------------------------------------|------------------------------------------------------------------------------------------|-------------|
| Medicine approved name        | Alendronic Acid                     | Frequency                                                                                | ONCE A WEEK |
| Dose                          | 70mg                                | Route                                                                                    | PO          |
| Signature                     | [Redacted]                          | Day Date                                                                                 | 2/11/14     |
| Pharmacy                      | [Redacted]                          | Additional instructions including instructions and proposed duration for anti-infectives |             |
| Patient Medicine on admission | <input checked="" type="checkbox"/> | Additional instructions                                                                  |             |

The error:

This patient erroneously received alendronic acid (alendronate) on two consecutive days instead of once a week because the dose administration section of the chart had not been clearly marked.

An overdose of alendronic acid may cause hypocalcaemia, hypophosphataemia or upper gastro-intestinal adverse events

**For drugs with an unusual dosing schedule, the days and times the dose is due must be indicated explicitly on the administration section of the drug chart, otherwise the patient may receive an incorrect dose**

Prescribing tips:

- Explicitly indicate when the dose is due by marking the whole of the dose administration section of the chart, to ensure the drug is administered on the intended days and times only.
- Some examples of prescribing drugs with unusual frequencies:

Once a week

Every 36 hours

3 times a week

| Regular Prescriptions         |                                     | Time                                                                                     | Date           |
|-------------------------------|-------------------------------------|------------------------------------------------------------------------------------------|----------------|
| Medicine approved name        | ALENDRONIC A.C.D                    | Frequency                                                                                | ONCE A WEEK    |
| Dose                          | 70mg                                | Route                                                                                    | PO             |
| Signature                     | Dr. Good Example                    | Day Date                                                                                 | 2/11/14        |
| Pharmacy                      | Bleep 9155                          | Additional instructions including instructions and proposed duration for anti-infectives |                |
| Patient Medicine on admission | <input checked="" type="checkbox"/> | Additional instructions                                                                  |                |
| Medicine approved name        | AMIKACIN                            | Frequency                                                                                | 36*            |
| Dose                          | 4                                   | Route                                                                                    | IV             |
| Signature                     | Dr. Good Example                    | Day Date                                                                                 | 2/11/14        |
| Pharmacy                      | Bleep 9155                          | Additional instructions including instructions and proposed duration for anti-infectives |                |
| Patient Medicine on admission | <input checked="" type="checkbox"/> | Additional instructions                                                                  |                |
| Medicine approved name        | HYDROXYCOBALAMIN                    | Frequency                                                                                | 3 times a week |
| Dose                          | 1mg                                 | Route                                                                                    | IM             |
| Signature                     | Dr. Good Example                    | Day Date                                                                                 | 2/11/14        |
| Pharmacy                      | Bleep 9155                          | Additional instructions including instructions and proposed duration for anti-infectives |                |
| Patient Medicine on admission | <input checked="" type="checkbox"/> | Additional instructions                                                                  |                |

Cross through the days and times the dose is not due

Remember to use your name-stamp or print your name when prescribing

Anonymised for review purposes
