# Supplementary material for: Improving feedback on junior doctors’ prescribing errors: mixed-methods evaluation of a quality improvement project
Source: PubMed Central journal article supplement (PMC5339559; doi:10.1136/bmjqs-2015-004717), 2016-04-04
Supplement: bmjqs-2015-004717supp_appendix3.pdf [file bmjqs-2015-004717supp_appendix3.pdf]

Appendix S3: Questionnaires

| <b>The Prescribing Improvement Model<br/>Prescribing Questionnaire for Foundation Year 1 Doctors</b>                                                                         |                                                                         |
|------------------------------------------------------------------------------------------------------------------------------------------------------------------------------|-------------------------------------------------------------------------|
| This questionnaire is part of a study helping us improve how pharmacists give feedback on prescribing errors to prescribers: your views on prescribing errors are important. |                                                                         |
| Current site:                                                                                                                                                                | Gender: Male <input type="checkbox"/> ; Female <input type="checkbox"/> |
| Previous sites worked at:                                                                                                                                                    | Undergraduate medical school:                                           |
| <i>Please circle the number which best represents your agreement with the statement. Replies are anonymous.</i>                                                              |                                                                         |
| Understanding prescribing errors                                                                                                                                             | Strongly disagree <span style="float: right;">Strongly agree</span>     |
| 1. I feel there is an open culture in this organisation with respect to discussing prescribing errors.                                                                       | 1 2 3 4 5 6 7 8                                                         |
| 2. I understand why doctors make prescribing errors                                                                                                                          | 1 2 3 4 5 6 7 8                                                         |
| 3. When I have made prescribing errors in the past, I understand why I made them                                                                                             | 1 2 3 4 5 6 7 8                                                         |
| 4. I am aware of the conditions under which I am likely to make a prescribing error                                                                                          | 1 2 3 4 5 6 7 8                                                         |
| 5. I believe I am aware of all major prescribing errors I make                                                                                                               | 1 2 3 4 5 6 7 8                                                         |
| 6. I believe I am aware of all minor prescribing errors I make                                                                                                               | 1 2 3 4 5 6 7 8                                                         |
| 7. I think knowing about the prescribing errors I make is important                                                                                                          | 1 2 3 4 5 6 7 8                                                         |
| 8. I think knowing about the prescribing errors others make is important                                                                                                     | 1 2 3 4 5 6 7 8                                                         |
| Evaluation of the current feedback you receive from pharmacists on prescribing errors                                                                                        | Strongly disagree <span style="float: right;">Strongly agree</span>     |
| 9. The feedback I currently receive is useful in improving my prescribing                                                                                                    | 1 2 3 4 5 6 7 8                                                         |
| 10. I feel I receive verbal feedback often enough for it to be useful                                                                                                        | 1 2 3 4 5 6 7 8                                                         |
| 11. I feel I receive written feedback often enough for it to be useful                                                                                                       | 1 2 3 4 5 6 7 8                                                         |
| 12. I receive verbal feedback soon enough after the event to be useful                                                                                                       | 1 2 3 4 5 6 7 8                                                         |
| 13. I receive written feedback soon enough after the event to be useful                                                                                                      | 1 2 3 4 5 6 7 8                                                         |
| 14. The feedback I receive on prescribing errors is highly relevant to my personal practice                                                                                  | 1 2 3 4 5 6 7 8                                                         |
| 15. I believe that the information I receive on prescribing errors from pharmacists is accurate                                                                              | 1 2 3 4 5 6 7 8                                                         |
| 16. I believe that the information I receive on prescribing errors is from a trusted source                                                                                  | 1 2 3 4 5 6 7 8                                                         |
| 17. The feedback I receive from pharmacists on prescribing errors is provided in a constructive manner                                                                       | 1 2 3 4 5 6 7 8                                                         |
| 18. Receiving feedback is a valuable use of my time                                                                                                                          | 1 2 3 4 5 6 7 8                                                         |
| Please continue overleaf                                                                                                                                                     |                                                                         |
| PIM Operational Group 14 May 2013 version 10 <span style="float: right;">1</span>                                                                                            |                                                                         |

| How is pharmacists' feedback on prescribing errors received?                                                                                         | Strongly disagree <span style="float: right;">Strongly agree</span> |
|------------------------------------------------------------------------------------------------------------------------------------------------------|---------------------------------------------------------------------|
| 19. I am always receptive to feedback I receive from pharmacists on my prescribing errors                                                            | 1 2 3 4 5 6 7 8                                                     |
| 20. The feedback I receive from pharmacists on prescribing errors is non-threatening                                                                 | 1 2 3 4 5 6 7 8                                                     |
| Response to receiving feedback on prescribing errors from pharmacists                                                                                | Strongly disagree <span style="float: right;">Strongly agree</span> |
| 21. Receiving feedback on prescribing errors has caused me to reflect on my prescribing practice                                                     | 1 2 3 4 5 6 7 8                                                     |
| 22. I have made changes to my prescribing practice in response to feedback received from pharmacists                                                 | 1 2 3 4 5 6 7 8                                                     |
| 23. I am happy to discuss prescribing errors with my peers                                                                                           | 1 2 3 4 5 6 7 8                                                     |
| 24. I think receiving formal feedback on prescribing errors means I would make fewer errors in the future                                            | 1 2 3 4 5 6 7 8                                                     |
| What kind of prescribing error feedback would you like to receive?                                                                                   | Strongly disagree <span style="float: right;">Strongly agree</span> |
| 25. I want to be told of all major prescribing errors I make                                                                                         | 1 2 3 4 5 6 7 8                                                     |
| 26. I want to be told of all prescribing errors I make, however minor                                                                                | 1 2 3 4 5 6 7 8                                                     |
| 27. I would like to have feedback by pharmacists which includes examples of specific errors I make                                                   | 1 2 3 4 5 6 7 8                                                     |
| 28. Feedback by pharmacists which includes generic guidance on prescribing practice would be useful                                                  | 1 2 3 4 5 6 7 8                                                     |
| 29. Feedback which includes statistical comparison with my peers would be useful                                                                     | 1 2 3 4 5 6 7 8                                                     |
| 30. I prefer to receive feedback on prescribing errors from pharmacists rather than senior doctors                                                   | 1 2 3 4 5 6 7 8                                                     |
| Do you have any comments or suggestions that would help pharmacists to provide better feedback?                                                      |                                                                     |
| _____                                                                                                                                                |                                                                     |
| _____                                                                                                                                                |                                                                     |
| _____                                                                                                                                                |                                                                     |
| What is the best format for pharmacists to provide feedback on prescribing errors to you? Consider mode of delivery, content, format, frequency etc. |                                                                     |
| _____                                                                                                                                                |                                                                     |
| _____                                                                                                                                                |                                                                     |
| PIM Operational Group 14 May 2013 version 10 <span style="float: right;">2</span>                                                                    |                                                                     |

## The Prescribing Improvement Model Questionnaire for Pharmacists

We want to support safe prescribing, increase doctors' confidence, enhance learning and make pharmacists' feedback more effective - your views are important.

Please only complete this questionnaire if you provide a ward pharmacy service

Which site do you most often provide **weekday** ward cover on: 1<sup>st</sup> \_\_\_\_\_; 2<sup>nd</sup> \_\_\_\_\_; 3<sup>rd</sup> \_\_\_\_\_.

Gender: Male ; Female  Band: 6 ; 7 ; 8

*Please circle the number which best represents your agreement with the statement. Replies are anonymous.*

| Understanding prescribing errors |                                                                                         | Strongly disagree | 1 | 2 | 3 | 4 | 5 | 6 | 7 | 8 | Strongly agree |
|----------------------------------|-----------------------------------------------------------------------------------------|-------------------|---|---|---|---|---|---|---|---|----------------|
| 1.                               | I feel there is an open culture with respect to discussing prescribing errors           |                   |   |   |   |   |   |   |   |   |                |
| 2.                               | I understand why doctors make prescribing errors                                        |                   |   |   |   |   |   |   |   |   |                |
| 3.                               | I am aware of the conditions under which doctors are likely to make a prescribing error |                   |   |   |   |   |   |   |   |   |                |
| 4.                               | I believe FY1s are aware of all <b>major</b> prescribing errors they make               |                   |   |   |   |   |   |   |   |   |                |
| 5.                               | I believe FY1s are aware of all <b>minor</b> prescribing errors they make               |                   |   |   |   |   |   |   |   |   |                |
| 6.                               | I think it is important that FY1s know about prescribing errors <b>other</b> FY1s make  |                   |   |   |   |   |   |   |   |   |                |

  

| Evaluation of the current feedback FY1s receive from pharmacists on their prescribing errors |                                                                                                                                           | Strongly disagree | 1 | 2 | 3 | 4 | 5 | 6 | 7 | 8 | Strongly agree |
|----------------------------------------------------------------------------------------------|-------------------------------------------------------------------------------------------------------------------------------------------|-------------------|---|---|---|---|---|---|---|---|----------------|
| 7.                                                                                           | In this trust pharmacy support FY1s in learning from their prescribing errors                                                             |                   |   |   |   |   |   |   |   |   |                |
| 8.                                                                                           | Robust processes are in place in this trust for monitoring and feeding back information about prescribing errors                          |                   |   |   |   |   |   |   |   |   |                |
| 9.                                                                                           | When I identify a prescribing error I always make a doctor aware that an error has been made                                              |                   |   |   |   |   |   |   |   |   |                |
| 10.                                                                                          | The feedback I currently give is useful in improving FY1s' prescribing                                                                    |                   |   |   |   |   |   |   |   |   |                |
| 11.                                                                                          | I am able to give <b>verbal</b> feedback <b>often</b> enough for it to be useful to FY1s                                                  |                   |   |   |   |   |   |   |   |   |                |
| 12.                                                                                          | I am able to give <b>written</b> feedback (e.g. in medical notes) <b>often</b> enough for it to be useful to FY1s                         |                   |   |   |   |   |   |   |   |   |                |
| 13.                                                                                          | I am able to give <b>verbal</b> feedback to FY1s <b>soon</b> enough after detecting an error for it to be useful                          |                   |   |   |   |   |   |   |   |   |                |
| 14.                                                                                          | I am able to give <b>written</b> feedback (e.g. in medical notes) to FY1s <b>soon</b> enough after detecting an error for it to be useful |                   |   |   |   |   |   |   |   |   |                |

PLEASE CONTINUE OVERLEAF

|     |                                                                                                       |  |  |  |  |  |  |  |  |  |  |
|-----|-------------------------------------------------------------------------------------------------------|--|--|--|--|--|--|--|--|--|--|
| 15. | I believe that the information FY1s receive on prescribing errors is accurate                         |  |  |  |  |  |  |  |  |  |  |
| 16. | I believe that FY1s find the feedback they receive on prescribing errors to be trustworthy            |  |  |  |  |  |  |  |  |  |  |
| 17. | I believe that I provide feedback to FY1s on prescribing errors in a constructive manner              |  |  |  |  |  |  |  |  |  |  |
| 18. | I always identify the specific prescriber who makes a prescribing error                               |  |  |  |  |  |  |  |  |  |  |
| 19. | Whenever I identify a prescribing error I give feedback to the specific prescriber who made the error |  |  |  |  |  |  |  |  |  |  |
| 20. | I feel comfortable talking to FY1s about prescribing errors                                           |  |  |  |  |  |  |  |  |  |  |
| 21. | I feel comfortable informing FY1s they have made a prescribing error                                  |  |  |  |  |  |  |  |  |  |  |
| 22. | Giving feedback is a valuable use of pharmacists' time                                                |  |  |  |  |  |  |  |  |  |  |

  

| How is pharmacists' feedback on prescribing errors received by doctors? |                                                                                                      | Strongly disagree | 1 | 2 | 3 | 4 | 5 | 6 | 7 | 8 | Strongly agree |
|-------------------------------------------------------------------------|------------------------------------------------------------------------------------------------------|-------------------|---|---|---|---|---|---|---|---|----------------|
| 23.                                                                     | FY1s are always interested in and engaged with the feedback they receive on their prescribing errors |                   |   |   |   |   |   |   |   |   |                |
| 24.                                                                     | I believe that FY1s find the feedback they receive to be non-threatening                             |                   |   |   |   |   |   |   |   |   |                |

  

| Support for giving feedback on prescribing errors to FY1s |                                                                                          | Strongly disagree | 1 | 2 | 3 | 4 | 5 | 6 | 7 | 8 | Strongly agree |
|-----------------------------------------------------------|------------------------------------------------------------------------------------------|-------------------|---|---|---|---|---|---|---|---|----------------|
| 25.                                                       | I feel supported by my organisation to give feedback to FY1s on their prescribing errors |                   |   |   |   |   |   |   |   |   |                |

  

| What kind of prescribing error feedback would you like to give to the FY1s? |                                                                                                                       | Strongly disagree | 1 | 2 | 3 | 4 | 5 | 6 | 7 | 8 | Strongly agree |
|-----------------------------------------------------------------------------|-----------------------------------------------------------------------------------------------------------------------|-------------------|---|---|---|---|---|---|---|---|----------------|
| 26.                                                                         | I want to inform FY1s of all <b>major</b> prescribing errors they make                                                |                   |   |   |   |   |   |   |   |   |                |
| 27.                                                                         | I want to inform FY1s of <b>all</b> prescribing errors they make, however minor                                       |                   |   |   |   |   |   |   |   |   |                |
| 28.                                                                         | I would like to give feedback to individual FY1s which includes examples of specific errors they have personally made |                   |   |   |   |   |   |   |   |   |                |
| 29.                                                                         | Feedback to FY1s which includes generic guidance on prescribing practice would be useful                              |                   |   |   |   |   |   |   |   |   |                |
| 30.                                                                         | Feedback to FY1s which includes statistical comparison with their peers would be useful                               |                   |   |   |   |   |   |   |   |   |                |

Do you have any comments or suggestions that would help pharmacists to provide better feedback?

\_\_\_\_\_

\_\_\_\_\_

What is the best format for pharmacists to provide feedback to FY1s on prescribing errors? Consider mode of delivery, content, format, frequency etc.

\_\_\_\_\_

\_\_\_\_\_
