# Supplementary material for: Improving feedback on junior doctors’ prescribing errors: mixed-methods evaluation of a quality improvement project
Source: PubMed Central journal article supplement (PMC5339559; doi:10.1136/bmjqs-2015-004717), 2016-04-04
Supplement: bmjqs-2015-004717supp_appendix4.pdf [file bmjqs-2015-004717supp_appendix4.pdf]

**Appendix S4:** Perceptions of feedback effectiveness (longitudinal data from site 1 for items included in the overall feedback effectiveness scale; significant effects shaded)

**Table 1: pharmacists**

|                                                                                                                                | Timepoint         |                    |        |       |                   |                    |        |       | Change in Mean |
|--------------------------------------------------------------------------------------------------------------------------------|-------------------|--------------------|--------|-------|-------------------|--------------------|--------|-------|----------------|
|                                                                                                                                | 1 (Spring 2013)   |                    |        |       | 2 (Spring 2014)   |                    |        |       |                |
|                                                                                                                                | Mean              | Standard Deviation | Median | Range | Mean              | Standard Deviation | Median | Range |                |
| 09 The feedback I currently give is useful in improving FY1s' prescribing                                                      | 5.68 <sub>a</sub> | 1.77               | 6      | 8     | 6.56 <sub>a</sub> | 1.50               | 7      | 6     | 0.88           |
| 10 I am able to give verbal feedback often enough for it to be useful to FY1s                                                  | 5.08 <sub>a</sub> | 1.53               | 5      | 4     | 5.17 <sub>a</sub> | 2.09               | 6      | 7     | 0.09           |
| 11 I am able to give written feedback (e.g. in medical notes) often enough for it to be useful to FY1s                         | 3.56 <sub>a</sub> | 1.85               | 3      | 6     | 3.06 <sub>a</sub> | 1.51               | 4      | 5     | -0.50          |
| 12 I am able to give verbal feedback to FY1s soon enough after detecting an error for it to be useful                          | 5.44 <sub>a</sub> | 1.58               | 6      | 6     | 5.67 <sub>a</sub> | 1.37               | 6      | 6     | 0.23           |
| 13 I am able to give written feedback (e.g. in medical notes) to FY1s soon enough after detecting an error for it to be useful | 3.80 <sub>a</sub> | 2.06               | 3      | 6     | 3.33 <sub>a</sub> | 1.75               | 4      | 6     | -0.47          |
| 15 I believe that the information FY1s receive on prescribing errors is accurate                                               | 5.32 <sub>a</sub> | 1.63               | 6      | 7     | 6.72 <sub>b</sub> | 1.07               | 7      | 4     | 1.40           |
| 16 I believe that FY1s find the feedback they receive on prescribing errors to be trustworthy                                  | 5.80 <sub>a</sub> | 1.04               | 6      | 5     | 6.67 <sub>b</sub> | 0.91               | 7      | 3     | 0.87           |

|                                                                                                                     |                   |      |   |   |                   |      |   |   |      |
|---------------------------------------------------------------------------------------------------------------------|-------------------|------|---|---|-------------------|------|---|---|------|
| 17 I believe that I provide feedback to FY1s on prescribing errors in a constructive manner                         | 6.16 <sub>a</sub> | 0.99 | 6 | 4 | 6.83 <sub>a</sub> | 1.20 | 7 | 5 | 0.67 |
| 18 Giving feedback is a valuable use of pharmacists' time                                                           | 6.72 <sub>a</sub> | 1.17 | 7 | 5 | 7.22 <sub>a</sub> | 1.26 | 8 | 5 | 0.50 |
| 31 In this trust pharmacy support FY1s in learning from their prescribing errors                                    | 5.04 <sub>a</sub> | 1.67 | 6 | 6 | 6.22 <sub>a</sub> | 1.63 | 6 | 6 | 1.18 |
| 32 Robust processes are in place in this trust for monitoring and feeding back information about prescribing errors | 4.56 <sub>a</sub> | 1.56 | 5 | 6 | 5.44 <sub>a</sub> | 1.46 | 6 | 5 | 0.88 |
| 33 When I identify a prescribing error I always make a doctor aware that an error has been made                     | 5.60 <sub>a</sub> | 1.63 | 6 | 6 | 6.50 <sub>a</sub> | 0.79 | 6 | 3 | 0.90 |
| 34 I always identify the specific prescriber who makes a prescribing error                                          | 4.24 <sub>a</sub> | 1.83 | 4 | 6 | 4.83 <sub>a</sub> | 2.15 | 5 | 7 | 0.59 |
| 35 Whenever I identify a prescribing error I give feedback to the specific prescriber who made the error            | 4.04 <sub>a</sub> | 1.74 | 4 | 6 | 5.28 <sub>a</sub> | 1.84 | 6 | 6 | 1.24 |
| 36 I feel comfortable talking to FY1s about prescribing errors                                                      | 6.60 <sub>a</sub> | 1.26 | 7 | 4 | 7.00 <sub>a</sub> | 0.69 | 7 | 2 | 0.40 |
| 37 I feel comfortable informing FY1s they have made a prescribing error                                             | 6.48 <sub>a</sub> | 1.33 | 7 | 4 | 6.94 <sub>a</sub> | 0.64 | 7 | 2 | 0.46 |
| Pharm.Eval                                                                                                          | 5.26 <sub>a</sub> | .88  | 5 | 3 | 5.84 <sub>b</sub> | 0.80 | 6 | 3 | 0.58 |

Notes: Values in the same row and sub-table not sharing the same subscript are significantly different in the two-sided test of equality for column means (items evaluated at  $p < 0.01$ ; Evaluative scale score evaluated at  $p < 0.05$ ). Cells with no subscript are not included in the test. Tests assume equal variances.

**Table 1: Foundation year 1 doctors**

|                                                                                            | Timepoint         |                    |        |       |                   |                    |        |       | Change in Mean |
|--------------------------------------------------------------------------------------------|-------------------|--------------------|--------|-------|-------------------|--------------------|--------|-------|----------------|
|                                                                                            | 1 (Spring 2013)   |                    |        |       | 2 (Spring 2014)   |                    |        |       |                |
|                                                                                            | Mean              | Standard Deviation | Median | Range | Mean              | Standard Deviation | Median | Range |                |
| 09 The feedback I currently receive is useful in improving my prescribing                  | 6.35 <sub>a</sub> | 1.13               | 6      | 4     | 6.68 <sub>a</sub> | 0.95               | 7      | 3     | 0.33           |
| 10 I feel I receive verbal feedback often enough for it to be useful                       | 5.92 <sub>a</sub> | 1.65               | 6      | 6     | 6.11 <sub>a</sub> | 2.02               | 7      | 7     | 0.19           |
| 11 I feel I receive written feedback often enough for it to be useful                      | 3.58 <sub>a</sub> | 1.72               | 4      | 6     | 4.84 <sub>a</sub> | 1.86               | 5      | 7     | 1.26           |
| 12 I receive verbal feedback soon enough after the event to be useful                      | 5.81 <sub>a</sub> | 1.55               | 6      | 6     | 5.74 <sub>a</sub> | 2.10               | 6      | 7     | -0.07          |
| 13 I receive written feedback soon enough after the event to be useful                     | 4.15 <sub>a</sub> | 2.07               | 4      | 7     | 4.16 <sub>a</sub> | 1.74               | 4      | 6     | 0.01           |
| 14 The feedback I receive on prescribing errors is highly relevant to my personal practice | 6.58 <sub>a</sub> | 0.95               | 7      | 3     | 6.74 <sub>a</sub> | 1.19               | 7      | 4     | 0.16           |
| 15 I believe that the information I receive on                                             | 7.19 <sub>a</sub> | .69                | 7      | 2     | 7.00 <sub>a</sub> | 0.82               | 7      | 3     | -0.19          |

|                                                                                                       |                   |      |   |   |                   |      |   |   |       |
|-------------------------------------------------------------------------------------------------------|-------------------|------|---|---|-------------------|------|---|---|-------|
| prescribing errors from pharmacists is accurate                                                       |                   |      |   |   |                   |      |   |   |       |
| 16 I believe that the information I receive on prescribing errors is from a trusted source            | 7.23 <sub>a</sub> | 0.86 | 7 | 3 | 6.95 <sub>a</sub> | 0.85 | 7 | 3 | -0.28 |
| 17 The feedback I receive from pharmacists on prescribing errors is provided in a constructive manner | 7.36 <sub>a</sub> | 0.81 | 8 | 2 | 7.05 <sub>a</sub> | 0.97 | 7 | 3 | -0.31 |
| 18 Receiving feedback is a valuable use of my time                                                    | 7.35 <sub>a</sub> | .80  | 8 | 2 | 7.00 <sub>a</sub> | 1.11 | 7 | 4 | -0.35 |
| FY1.Eval                                                                                              | 6.15 <sub>a</sub> | .74  | 6 | 3 | 6.23 <sub>a</sub> | .86  | 6 | 4 | 0.08  |

Note: Values in the same row and sub-table not sharing the same subscript are significantly different in the two-sided test of equality for column means (items evaluated at  $p < 0.01$ ; Evaluative scale score evaluated at  $p < 0.05$ ). Cells with no subscript are not included in the test. Tests assume equal variances.
