# Supplementary material for: Improving feedback on junior doctors’ prescribing errors: mixed-methods evaluation of a quality improvement project
Source: PubMed Central journal article supplement (PMC5339559; doi:10.1136/bmjqs-2015-004717), 2016-04-04
Supplement: bmjqs-2015-004717supp_appendix5.pdf [file bmjqs-2015-004717supp_appendix5.pdf]

## Appendix S5: Types of errors identified

| Technical Errors                                                            |           |           | Clinical Errors                                                 |            |            |
|-----------------------------------------------------------------------------|-----------|-----------|-----------------------------------------------------------------|------------|------------|
| Error description                                                           | Site 1    | Site 2    | Error description                                               | Site 1     | Site 2     |
| Missing drug name                                                           | 0         | 0         | Incorrect drug                                                  | 15         | 15         |
| Missing dose                                                                | 5         | 14        | Incorrect dose                                                  | 96         | 79         |
| Missing duration of treatment                                               | 2         | 1         | Incorrect duration of therapy                                   | 5          | 11         |
| Missing frequency or dosing schedule                                        | 10        | 7         | Incorrect frequency or dosing schedule (but correct daily dose) | 22         | 15         |
| Missing route                                                               | 7         | 0         | Incorrect route                                                 | 9          | 3          |
| Missing formulation or brand name where relevant or required                | 6         | 4         | Incorrect formulation                                           | 20         | 27         |
| Missing signature                                                           | 15        | 31        | Medication omitted when clinically indicated                    | 67         | 105        |
| Missing date                                                                | 22        | 9         | Drug prescribed is not indicated for patient                    | 26         | 8          |
| Missing patient information                                                 | 0         | 1         | Failure to take into account a drug interaction                 | 2          | 4          |
| Incorrect patient information                                               | 0         | 0         | Drug prescribed is contra-indicated                             | 6          | 0          |
| Inappropriate abbreviation                                                  | 3         | 8         | Duplicated therapy                                              | 20         | 21         |
| Illegible or unclear prescription                                           | 1         | 2         | Prescribing a drug to which the patient is allergic             | 1          | 1          |
| Missing instructions for use or administration                              | 0         | 4         | Incorrect instructions for use or administration                | 5          | 7          |
| Missing stop or review date for antibiotic therapy                          | 13        | 7         |                                                                 |            |            |
| Missing indication stated for antibiotic therapy                            | 11        | 6         |                                                                 |            |            |
| Incorrect spelling of drug name (excludes minor misspelling of a drug name) | 1         | 1         |                                                                 |            |            |
| <b>Technical total</b>                                                      | <b>96</b> | <b>95</b> | <b>Clinical total</b>                                           | <b>294</b> | <b>296</b> |
